# Supplementary material for: Innovative optimization for enhancing Pb2+ biosorption from aqueous solutions using Bacillus subtilis
Source: PubMed Central journal article supplement (PMC11338800; doi:10.3389/fmicb.2024.1384639), 2024-08-08
Supplement: Table_1.pdf [file Table_1.pdf]

## Innovative optimization for enhancing $Pb^{2+}$ biosorption from aqueous solutions using *Bacillus subtilis*

Reyad M. El-Sharkawy<sup>1\*</sup>, Mohamed Khairy<sup>2,3</sup>, Mohamed H. H. Abbas<sup>4</sup>, Magdi E. A. Zaki<sup>2</sup>, Abdalla E. El-Hadary<sup>5</sup>

<sup>1</sup>Botany and Microbiology Department, Faculty of Science, Benha University, Benha 13511, Egypt; [r.m.elsharkawy@fsc.bu.edu.eg](mailto:r.m.elsharkawy@fsc.bu.edu.eg)

<sup>2</sup>Chemistry Department, College of Science, Imam Mohammad Ibn Saud Islamic University (IMSIU), Riyadh 11623, Saudi arabia; [mkomran@imamu.edu.sa](mailto:mkomran@imamu.edu.sa); [mezaki@imamu.edu.sa](mailto:mezaki@imamu.edu.sa)

<sup>3</sup>Chemistry Department, Faculty of Science, Benha University, Benha 13518, Egypt

<sup>4</sup>Soils and Water Department, Faculty of Agriculture, Benha University, Benha, Egypt

<sup>5</sup>Biochemistry Department, Faculty of Agriculture, Benha University, Benha, Egypt

**\* Correspondence:**

Reyad M. El-Sharkawy

[r.m.elsharkawy@fsc.bu.edu.eg](mailto:r.m.elsharkawy@fsc.bu.edu.eg), <https://orcid.org/0000-0003-1319-9066>

Figure S1: Graphs of three-dimensional surface plots of SDS for the  $Pb^{2+}$  removal by *B. subtilis*, illustrating the interactive configuration of each two set of the independent variables, keeping the other variables at the middle level.

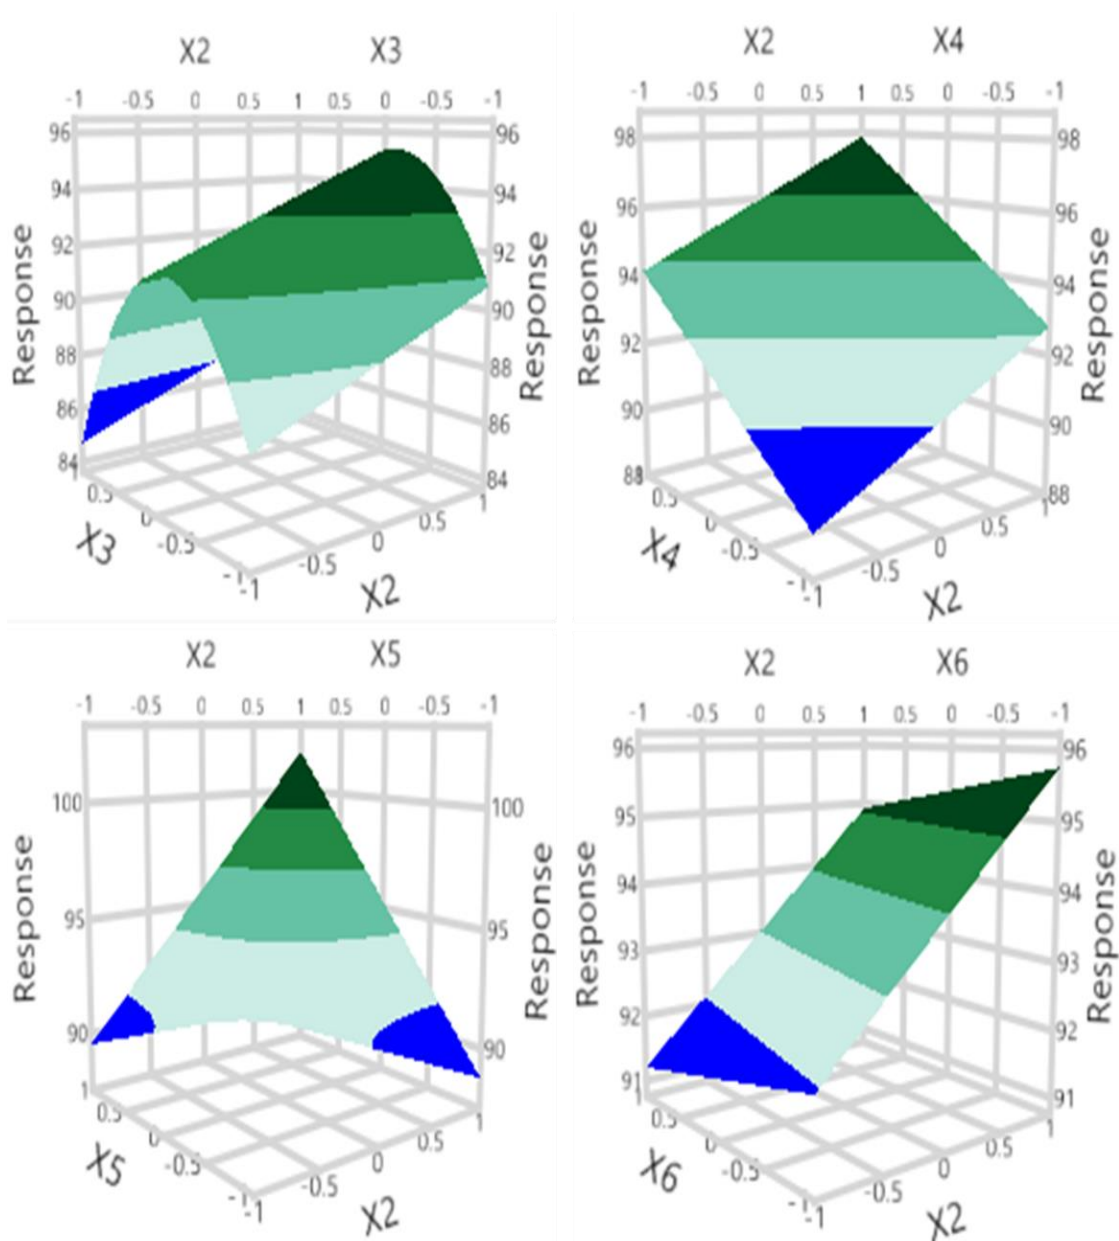

A) interaction of temperature (X<sub>2</sub>, °C) with the other variables.

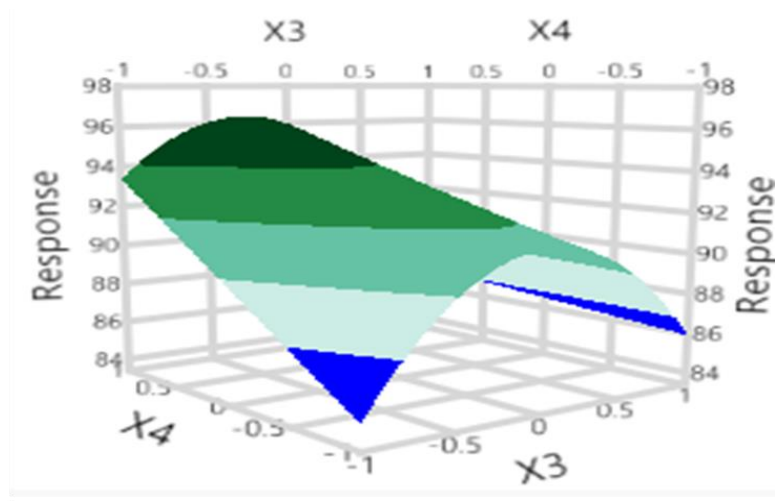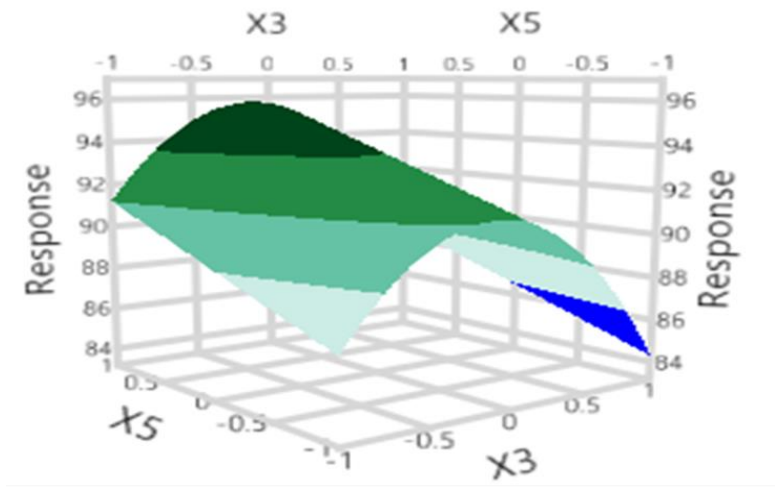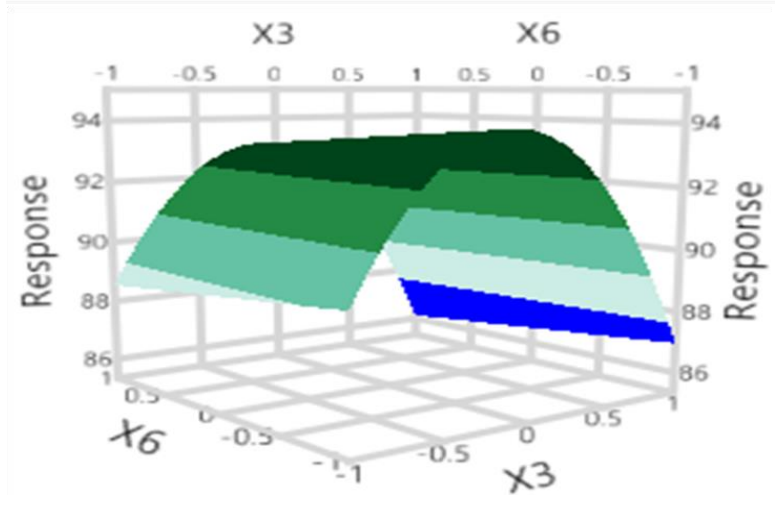

B) interaction of glucose (X<sub>3</sub>, %) with the other variables.

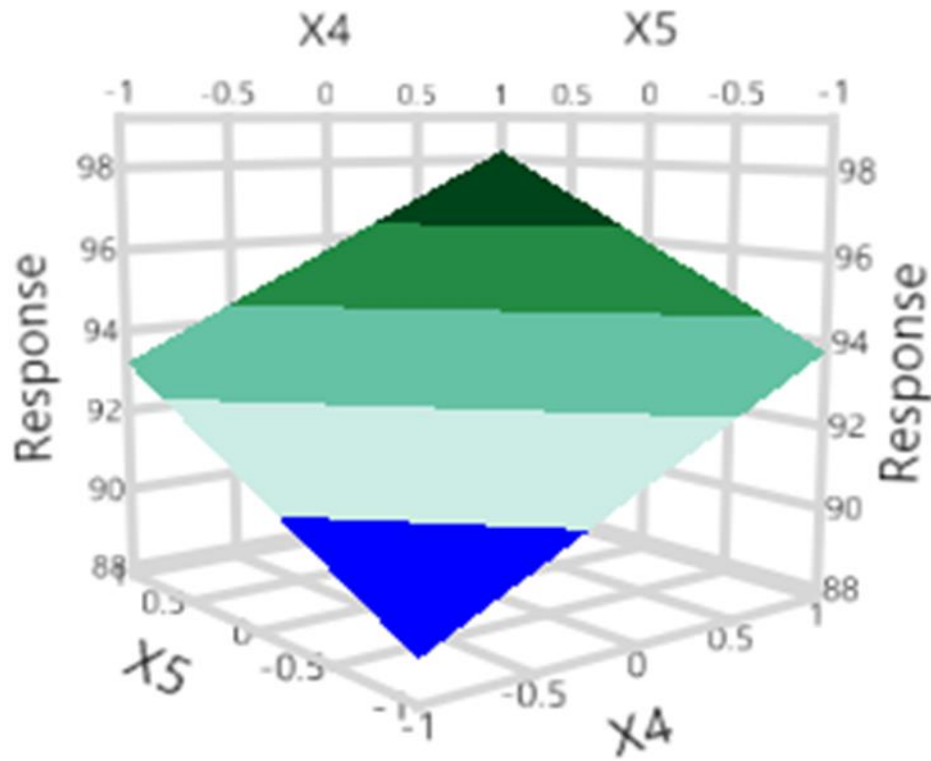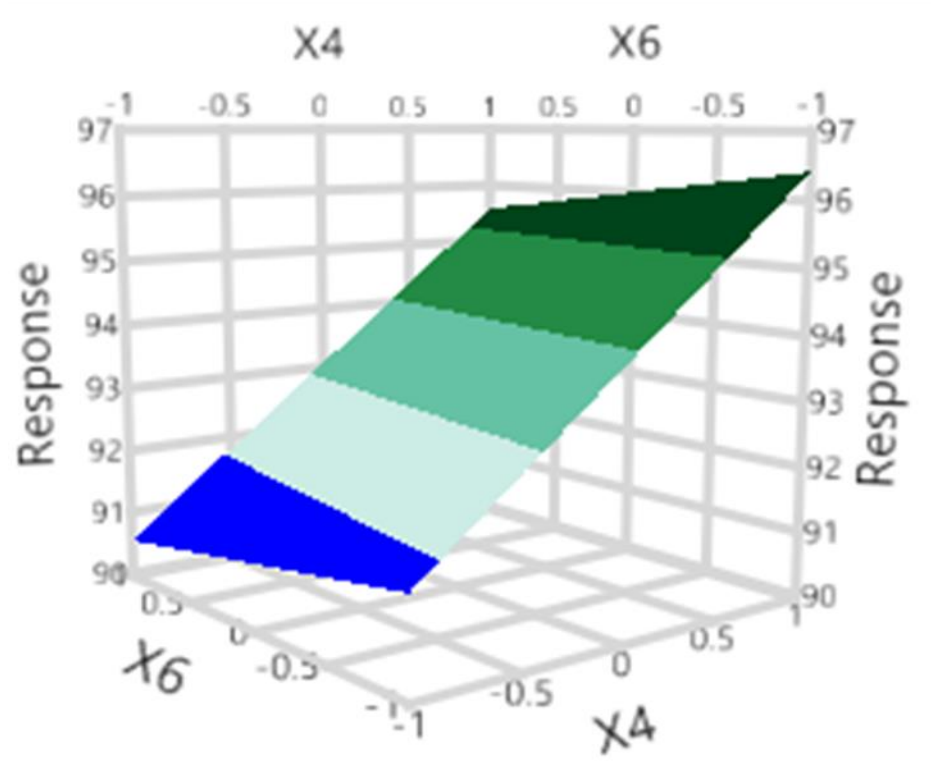

C) interaction of yeast extract (X<sub>4</sub>, %) with the other variables.

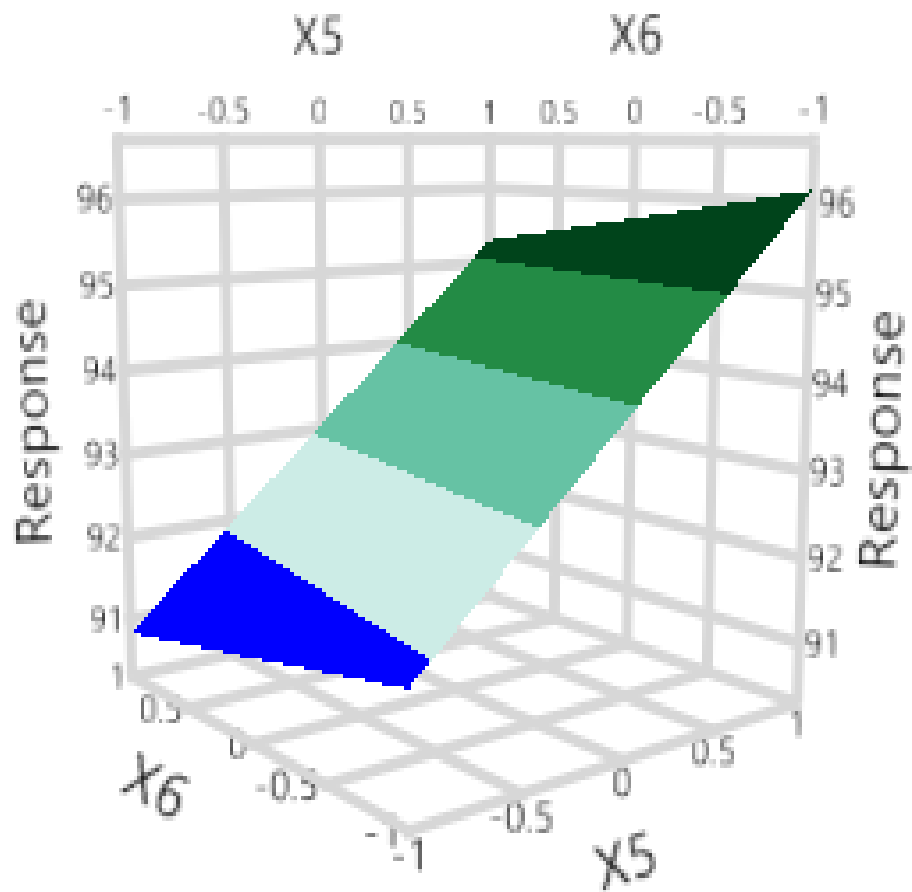

D) interaction of  $\text{MgSO}_4 \cdot 7\text{H}_2\text{O}$  (%) ( $X_5$ , %) with  $\text{K}_2\text{HPO}_4$  ( $X_6$ , %) variables.

Figure S2: Graphs of three-dimensional surface plots of ANN for the  $Pb^{2+}$  removal by *B. subtilis*, illustrating the interactive configuration of each two set of the independent variables, keeping the other variables at the middle level.

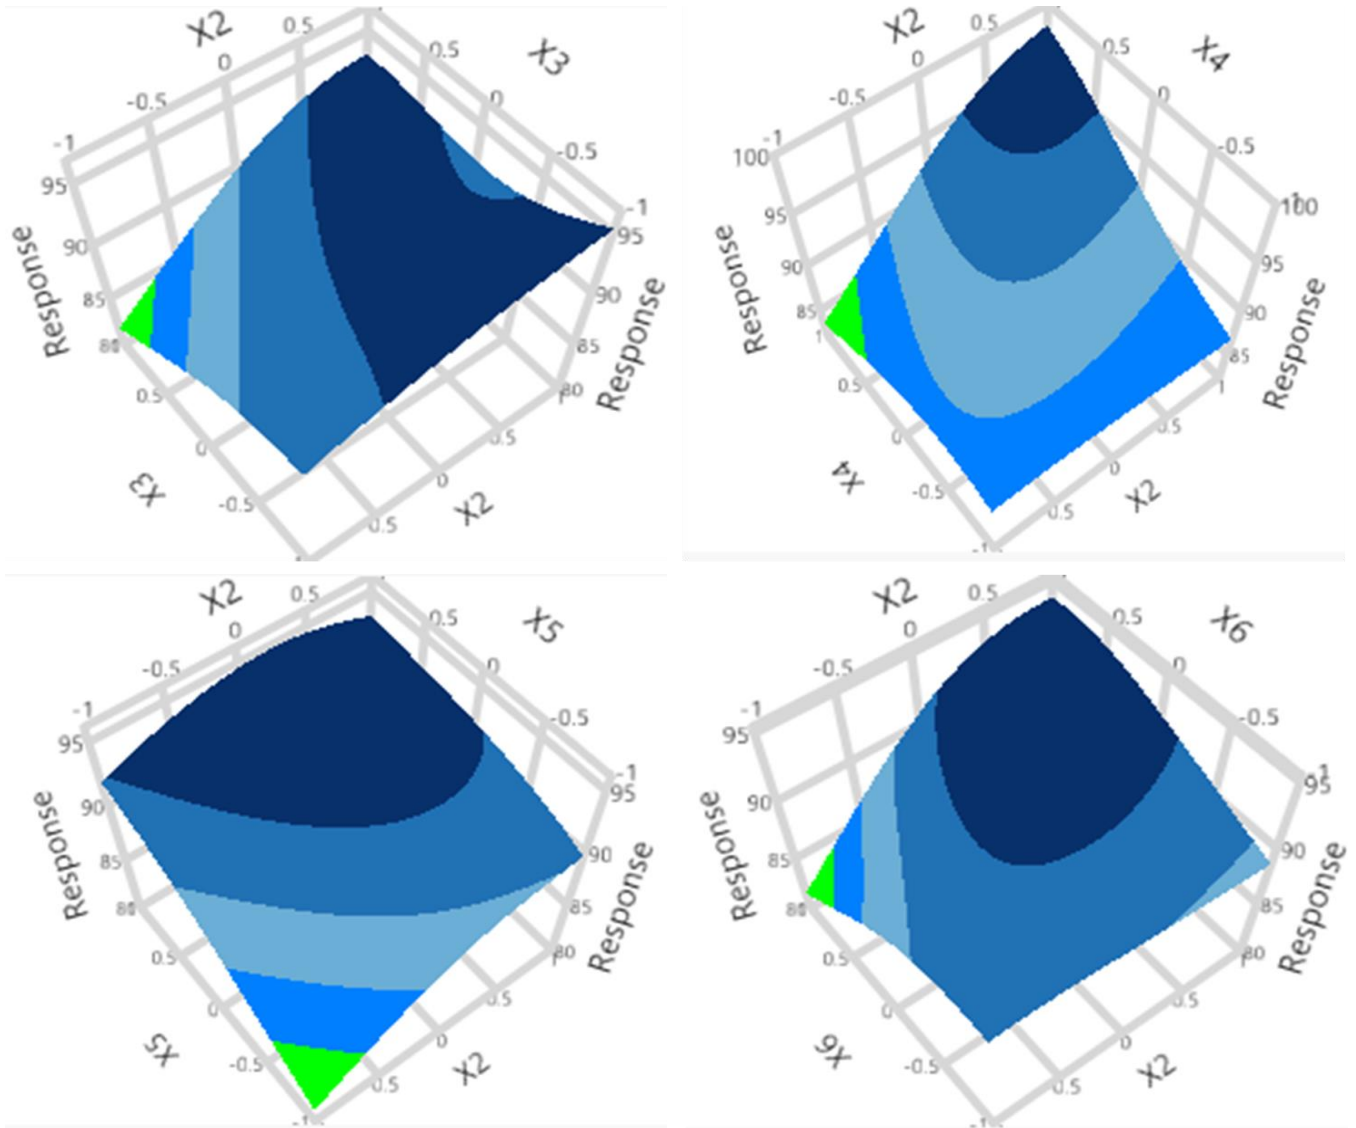

A) interaction of temperature ( $X_2$ , °C) with the other variables.

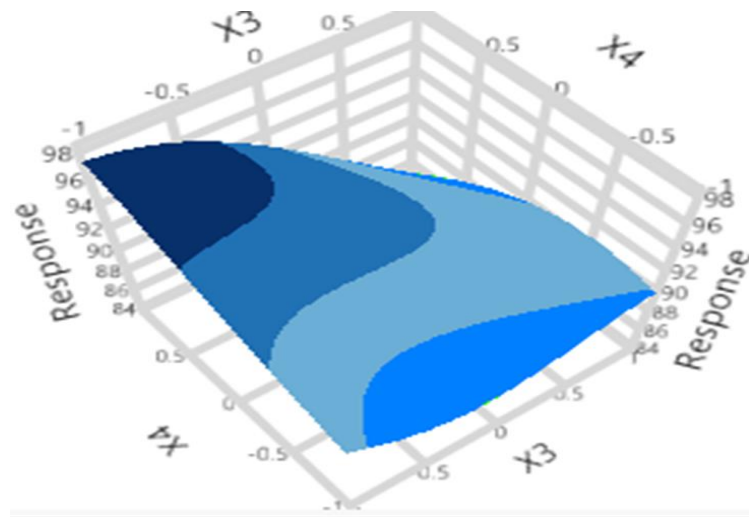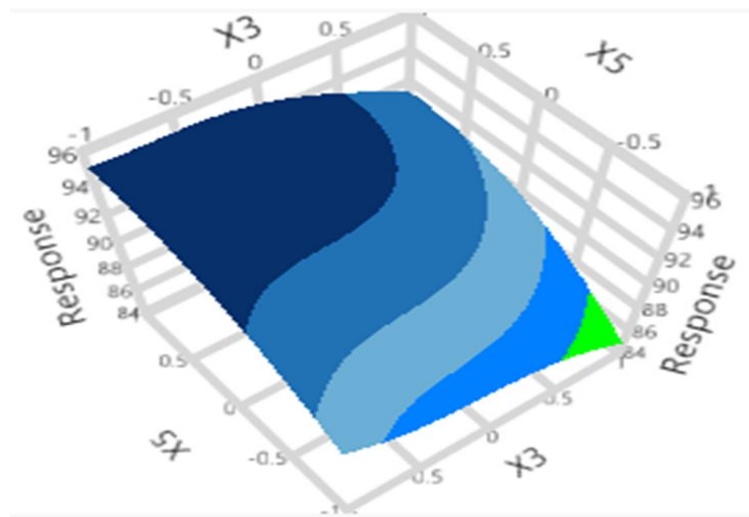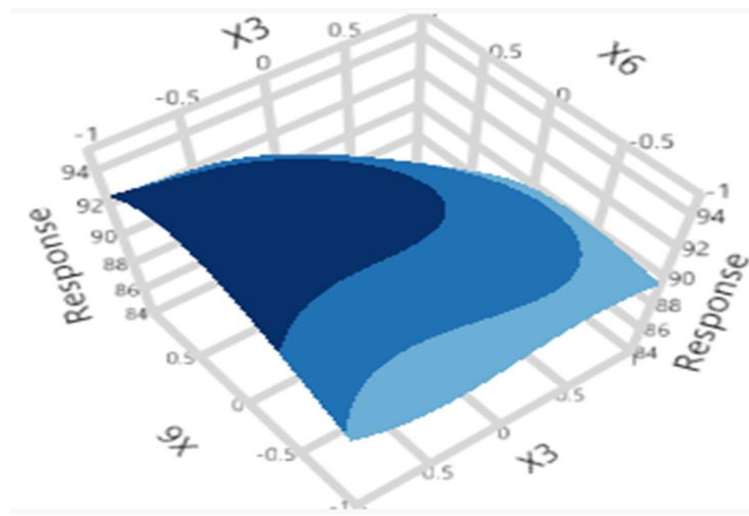

B) interaction of glucose ( $X_3$ , %) with the other variables.

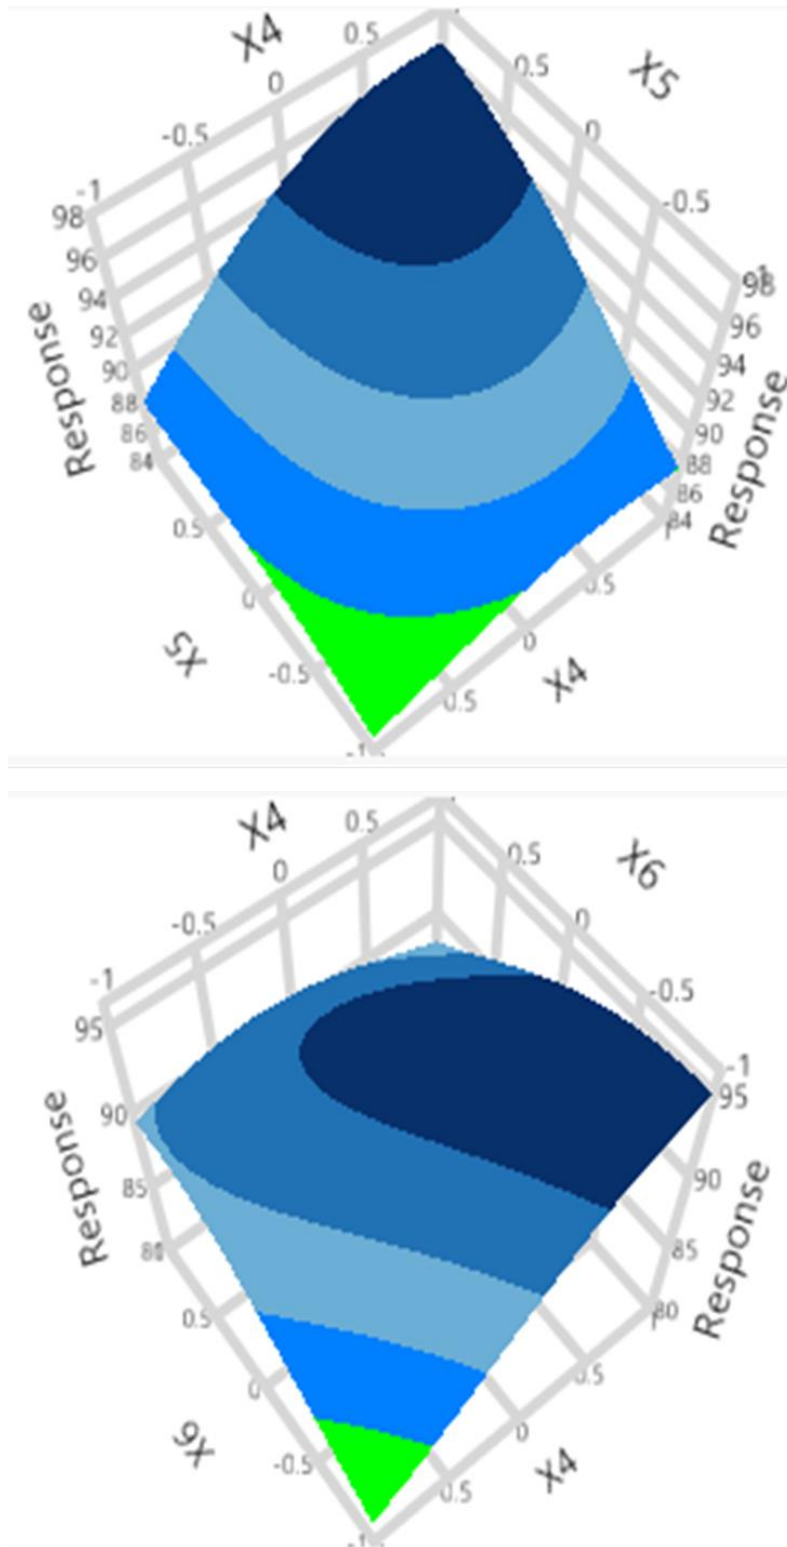

C) interaction of yeast extract (X<sub>4</sub>, %) with the other variables.



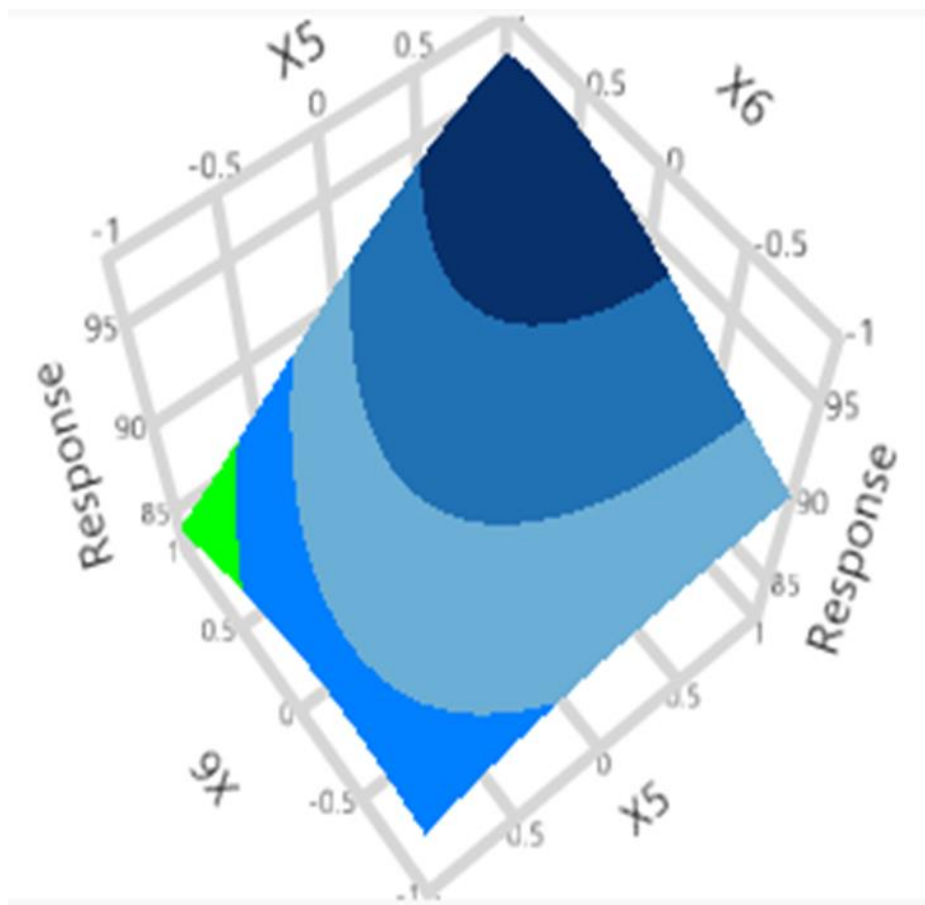

D) interaction of  $\text{MgSO}_4 \cdot 7\text{H}_2\text{O}$  (%) ( $X_5$ , %) with  $\text{K}_2\text{HPO}_4$  ( $X_6$ ,%) variables.

**Table S1:** Comparison of the DSD and ANN models statistics for the  $\text{Pb}^{2+}$  removal by *B. subtilis*. Variation coefficient ( $R^2$ ), root mean squared error (RMSE), average absolute deviation (AAD), and sum of error's squares (SES) for each operated model were detected.

|               |           | <b>Model</b> |            |
|---------------|-----------|--------------|------------|
|               |           | <b>DSD</b>   | <b>ANN</b> |
| Training      | $R^2$     | 0.8345       | 0.9865     |
|               | RMSE      | 2.622        | 0.7496     |
|               | Frequency | 11           | 11         |
| Validation    | $R^2$     | 0.8858       | 0.9964     |
|               | RMSE      | 2.539        | 0.4482     |
|               | Frequency | 6            | 6          |
| Overall model | $R^2$     | 0.9828       | 0.9999     |
|               | RMSE      | 1.3925       | 0.0468     |
|               | SES       | 634.706      | 88.789     |
|               | AAD       | 1.5077       | 0.0016     |
|               | Frequency | 17           | 17         |

**Table S2:** The predicted and experimental values of the Pb<sup>2+</sup> removal by *B. subtilis* under optimal conditions.

| <b>Independent variable</b>              | <b>Optimum conditions</b> | <b>Experimental conditions</b> |
|------------------------------------------|---------------------------|--------------------------------|
| pH                                       | 6.1                       | 6.1                            |
| temperature (°C)                         | 30.8                      | 30                             |
| yeast extract (%)                        | 1.7                       | 1.7                            |
| Glucose (%)                              | 1.5                       | 1.5                            |
| MgSO <sub>4</sub> .7H <sub>2</sub> O (%) | 0.2                       | 0.2                            |
| K <sub>2</sub> HPO <sub>4</sub> (%)      | 0.2                       | 0.2                            |
| Pb <sup>2+</sup> removal (%)             | 96.98                     | 96.12                          |
